# Supplementary material for: A nationwide study of metabolic syndrome prevalence in Iran; a comparative analysis of six definitions
Source: PubMed Central journal article supplement (PMC7928520; doi:10.1371/journal.pone.0241926), 2021-03-03
Supplement: pone.0241926.s002.pdf [file pone.0241926.s002.pdf]

# WHO STEPS Instrument

## (Core and Expanded)

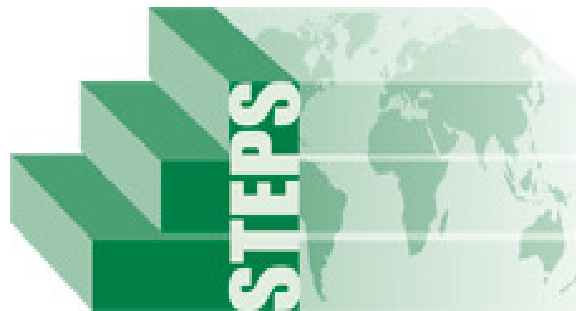

### The WHO STEPwise approach to noncommunicable disease risk factor surveillance (STEPS)

World Health Organization  
20 Avenue Appia, 1211 Geneva 27, Switzerland

For further information: [www.who.int/chp/steps](http://www.who.int/chp/steps)

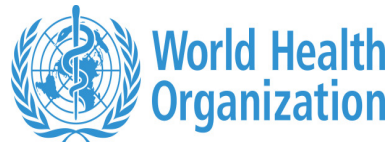

# STEPS Instrument

## Overview

**Introduction** This is the generic STEPS Instrument which sites/countries will use to develop their tailored instrument. It contains the:

- CORE items (unshaded boxes)
  - EXPANDED items (shaded boxes).
- 

**Core Items** The Core items for each section ask questions required to calculate basic variables. For example:

- current daily smokers
- mean BMI.

**Note:** All the core questions should be asked, removing core questions will impact the analysis.

---

**Expanded items** The Expanded items for each section ask more detailed information. Examples include:

- use of smokeless tobacco
  - sedentary behaviour.
- 

**Guide to the columns** The table below is a brief guide to each of the columns in the Instrument.

| Column   | Description                                                                                                                                                                                                                                       | Site Tailoring                                                                                                                                                                 |
|----------|---------------------------------------------------------------------------------------------------------------------------------------------------------------------------------------------------------------------------------------------------|--------------------------------------------------------------------------------------------------------------------------------------------------------------------------------|
| Question | Each question is to be read to the participants                                                                                                                                                                                                   | <ul style="list-style-type: none"><li>• Select sections to use.</li><li>• Add expanded and optional questions as desired.</li></ul>                                            |
| Response | This column lists the available response options which the interviewer will be circling or filling in the text boxes. The skip instructions are shown on the right hand side of the responses and should be carefully followed during interviews. | <ul style="list-style-type: none"><li>• Add site specific responses for demographic responses (e.g. C6).</li><li>• Change skip question identifiers where necessary.</li></ul> |
| Code     | The column is designed to match data from the instrument into the data entry tool, data analysis syntax, data book, and fact sheet.                                                                                                               | This should never be changed or removed. The code is used as a general identifier for the data entry and analysis.                                                             |



## Step 1 Demographic Information

| CORE: Demographic Information                                                                    |                                                              |      |
|--------------------------------------------------------------------------------------------------|--------------------------------------------------------------|------|
| Question                                                                                         | Response                                                     | Code |
| Sex ( <i>Record Male / Female as observed</i> )                                                  | Male 1<br>Female 2                                           | C1   |
| What is your date of birth?<br><i>Don't Know 77 77 7777</i>                                      | _ _ _   _ _   _ _ _  <i>If known, Go to C4</i><br>dd mm year | C2   |
| How old are you?                                                                                 | Years  _ _                                                   | C3   |
| In total, how many years have you spent at school and in full-time study (excluding pre-school)? | Years  _ _                                                   | C4   |

| EXPANDED: Demographic Information                                                                                                                                           |                                                                                                                                                                                                                        |    |
|-----------------------------------------------------------------------------------------------------------------------------------------------------------------------------|------------------------------------------------------------------------------------------------------------------------------------------------------------------------------------------------------------------------|----|
| What is the <b>highest level of education</b> you have completed?<br><br><i>[INSERT COUNTRY-SPECIFIC CATEGORIES]</i>                                                        | No formal schooling 1<br>Less than primary school 2<br>Primary school completed 3<br>Secondary school completed 4<br>High school completed 5<br>College/University completed 6<br>Post graduate degree 7<br>Refused 88 | C5 |
| What is your <i>[insert relevant ethnic group / racial group / cultural subgroup / others]</i> <b>background</b> ?                                                          | <i>[Locally defined]</i> 1<br><i>[Locally defined]</i> 2<br><i>[Locally defined]</i> 3<br>Refused 88                                                                                                                   | C6 |
| What is your <b>marital status</b> ?                                                                                                                                        | Never married 1<br>Currently married 2<br>Separated 3<br>Divorced 4<br>Widowed 5<br>Cohabiting 6<br>Refused 88                                                                                                         | C7 |
| Which of the following best describes your <b>main work</b> status over the past 12 months?<br><br><i>[INSERT COUNTRY-SPECIFIC CATEGORIES]</i><br><br><i>(USE SHOWCARD)</i> | Government employee 1<br>Non-government employee 2<br>Self-employed 3<br>Non-paid 4<br>Student 5<br>Homemaker 6<br>Retired 7<br>Unemployed (able to work) 8<br>Unemployed (unable to work) 9<br>Refused 88             | C8 |
| How many people older than 18 years, including yourself, live in your household?                                                                                            | Number of people  _ _                                                                                                                                                                                                  | C9 |

| EXPANDED: Demographic Information, Continued                                                                                                                                                      |                                                     |      |
|---------------------------------------------------------------------------------------------------------------------------------------------------------------------------------------------------|-----------------------------------------------------|------|
| Question                                                                                                                                                                                          | Response                                            | Code |
| Taking <b>the past year</b> , can you tell me what the average earnings of the household have been?<br>(RECORD ONLY ONE, NOT ALL 3)                                                               | Per week  _ _ _ _ _ _ _ _ _ _ _ _ _ _  Go to T1     | C10a |
|                                                                                                                                                                                                   | OR per month  _ _ _ _ _ _ _ _ _ _ _ _ _ _  Go to T1 | C10b |
|                                                                                                                                                                                                   | OR per year  _ _ _ _ _ _ _ _ _ _ _ _ _ _  Go to T1  | C10c |
|                                                                                                                                                                                                   | Refused 88                                          | C10d |
| If you don't know the amount, can you give an <b>estimate</b> of the annual household income if I read some options to you? Is it<br>[INSERT QUINTILE VALUES IN LOCAL CURRENCY]<br>(READ OPTIONS) | ≤ Quintile (Q) 1 1                                  | C11  |
|                                                                                                                                                                                                   | More than Q 1, ≤ Q 2 2                              |      |
|                                                                                                                                                                                                   | More than Q 2, ≤ Q 3 3                              |      |
|                                                                                                                                                                                                   | More than Q 3, ≤ Q 4 4                              |      |
|                                                                                                                                                                                                   | More than Q 4 5                                     |      |
|                                                                                                                                                                                                   | Don't Know 77                                       |      |
| Refused 88                                                                                                                                                                                        |                                                     |      |









| CORE: Alcohol Consumption, continued                                                                                                                                                                                                                                                                                                                                                                           |                                                                                              |      |
|----------------------------------------------------------------------------------------------------------------------------------------------------------------------------------------------------------------------------------------------------------------------------------------------------------------------------------------------------------------------------------------------------------------|----------------------------------------------------------------------------------------------|------|
| I have just asked you about your consumption of alcohol during the past 7 days. The questions were about alcohol in general, while the next questions refer to your consumption of homebrewed alcohol, alcohol brought over the border/from another country, any alcohol not intended for drinking or other untaxed alcohol. Please only think about these types of alcohol when answering the next questions. |                                                                                              |      |
| Question                                                                                                                                                                                                                                                                                                                                                                                                       | Response                                                                                     | Code |
| During the <b>past 7 days</b> , did you consume any <b>homebrewed</b> alcohol, any alcohol <b>brought over the border/from another country</b> , any alcohol <b>not intended for drinking</b> or other <b>untaxed</b> alcohol?<br><i>[AMEND ACCORDING TO LOCAL CONTEXT]</i><br><i>(USE SHOWCARD)</i>                                                                                                           | Yes 1<br><br>No 2 <i>If No, go to A13</i>                                                    | A11  |
| On average, <b>how many standard drinks</b> of the following did you consume <b>during the past 7 days</b> ?<br><br><i>[INSERT COUNTRY-SPECIFIC EXAMPLES]</i><br><i>(USE SHOWCARD)</i><br><br><i>Don't Know 77</i>                                                                                                                                                                                             | Homebrewed spirits, e.g. moonshine  _ _                                                      | A12a |
|                                                                                                                                                                                                                                                                                                                                                                                                                | Homebrewed beer or wine, e.g. beer, palm or fruit wine  _ _                                  | A12b |
|                                                                                                                                                                                                                                                                                                                                                                                                                | Alcohol brought over the border/from another country  _ _                                    | A12c |
|                                                                                                                                                                                                                                                                                                                                                                                                                | Alcohol not intended for drinking, e.g. alcohol-based medicines, perfumes, after shaves  _ _ | A12d |
|                                                                                                                                                                                                                                                                                                                                                                                                                | Other untaxed alcohol in the country  _ _                                                    | A12e |

| EXPANDED: Alcohol Consumption                                                                                                                   |                                                                                                                          |     |
|-------------------------------------------------------------------------------------------------------------------------------------------------|--------------------------------------------------------------------------------------------------------------------------|-----|
| During the <b>past 12 months</b> , how often have you found that you were not able to stop drinking once you had started?                       | Daily or almost daily 1<br>Weekly 2<br>Monthly 3<br>Less than monthly 4<br>Never 5                                       | A13 |
| During the <b>past 12 months</b> , how often have you failed to do what was normally expected from you because of drinking?                     | Daily or almost daily 1<br>Weekly 2<br>Monthly 3<br>Less than monthly 4<br>Never 5                                       | A14 |
| During the <b>past 12 months</b> , how often have you needed a first drink in the morning to get yourself going after a heavy drinking session? | Daily or almost daily 1<br>Weekly 2<br>Monthly 3<br>Less than monthly 4<br>Never 5                                       | A15 |
| During the <b>past 12 months</b> , have you had family problems or problems with your partner due to <b>someone else's</b> drinking?            | Yes, more than monthly 1<br>Yes, monthly 2<br>Yes, several times but less than monthly 3<br>Yes, once or twice 4<br>No 5 | A16 |

| CORE: Diet                                                                                                                                                                                                                                                                                                                                                                                                                                                                                                                                                                                                                             |                                                                                                              |      |
|----------------------------------------------------------------------------------------------------------------------------------------------------------------------------------------------------------------------------------------------------------------------------------------------------------------------------------------------------------------------------------------------------------------------------------------------------------------------------------------------------------------------------------------------------------------------------------------------------------------------------------------|--------------------------------------------------------------------------------------------------------------|------|
| The next questions ask about the fruits and vegetables that you usually eat. I have a nutrition card here that shows you some examples of local fruits and vegetables. Each picture represents the size of a serving. As you answer these questions please think of a typical week in the last year.                                                                                                                                                                                                                                                                                                                                   |                                                                                                              |      |
| Question                                                                                                                                                                                                                                                                                                                                                                                                                                                                                                                                                                                                                               | Response                                                                                                     | Code |
| In a typical week, on how many days do you <b>eat fruit</b> ?<br>(USE SHOWCARD)                                                                                                                                                                                                                                                                                                                                                                                                                                                                                                                                                        | Number of days<br>Don't Know 77  _ _  If Zero days, go to D3                                                 | D1   |
| How many <b>servings</b> of fruit do you eat on <b>one</b> of those days?<br>(USE SHOWCARD)                                                                                                                                                                                                                                                                                                                                                                                                                                                                                                                                            | Number of servings<br>Don't Know 77  _ _                                                                     | D2   |
| In a typical week, on how many days do you <b>eat vegetables</b> ?<br>(USE SHOWCARD)                                                                                                                                                                                                                                                                                                                                                                                                                                                                                                                                                   | Number of days<br>Don't Know 77  _ _  If Zero days, go to D5                                                 | D3   |
| How many <b>servings</b> of vegetables do you eat on one of those days? (USE SHOWCARD)                                                                                                                                                                                                                                                                                                                                                                                                                                                                                                                                                 | Number of servings<br>Don't know 77  _ _                                                                     | D4   |
| Dietary salt                                                                                                                                                                                                                                                                                                                                                                                                                                                                                                                                                                                                                           |                                                                                                              |      |
| With the next questions, we would like to learn more about salt in your diet. Dietary salt includes ordinary table salt, unrefined salt such as sea salt, iodized salt, salty stock cubes and powders, and salty sauces such as soya sauce or fish sauce (see showcard). The following questions are on adding salt to the food right before you eat it, on how food is prepared in your home, on eating processed foods that are high in salt such as <i>[insert country specific examples]</i> , and questions on controlling your salt intake. Please answer the questions even if you consider yourself to eat a diet low in salt. |                                                                                                              |      |
| How often do you <b>add salt or a salty sauce such as soya sauce</b> to your food right before you eat it or as you are eating it?<br><br>(SELECT ONLY ONE)<br><br>(USE SHOWCARD)                                                                                                                                                                                                                                                                                                                                                                                                                                                      | Always 1<br>Often 2<br>Sometimes 3<br>Rarely 4<br>Never 5<br>Don't know 77                                   | D5   |
| How often is <b>salt, salty seasoning or a salty sauce added</b> in cooking or preparing foods in your household?                                                                                                                                                                                                                                                                                                                                                                                                                                                                                                                      | Always 1<br>Often 2<br>Sometimes 3<br>Rarely 4<br>Never 5<br>Don't know 77                                   | D6   |
| How often do you eat <b>processed food high in salt</b> ? By processed food high in salt, I mean foods that have been altered from their natural state, such as packaged salty snacks, canned salty food including pickles and preserves, salty food prepared at a fast food restaurant, cheese, bacon and processed meat <i>[add country specific examples]</i> .<br><i>[INSERT EXAMPLES]</i><br>(USE SHOWCARD)                                                                                                                                                                                                                       | Always 1<br>Often 2<br>Sometimes 3<br>Rarely 4<br>Never 5<br>Don't know 77                                   | D7   |
| <b>How much salt or salty sauce</b> do you think you consume?                                                                                                                                                                                                                                                                                                                                                                                                                                                                                                                                                                          | Far too much 1<br>Too much 2<br>Just the right amount 3<br>Too little 4<br>Far too little 5<br>Don't know 77 | D8   |











**CORE (for women only): Cervical Cancer Screening**

The next question asks about cervical cancer prevention. Screening tests for cervical cancer prevention can be done in different ways, including Visual Inspection with Acetic Acid/vinegar (VIA), pap smear and Human Papillomavirus (HPV) test. VIA is an inspection of the surface of the uterine cervix after acetic acid (or vinegar) has been applied to it. For both pap smear and HPV test, a doctor or nurse uses a swab to wipe from inside your vagina, take a sample and send it to a laboratory. It is even possible that you were given the swab yourself and asked to swab the inside of your vagina. The laboratory checks for abnormal cell changes if a pap smear is done, and for the HP virus if an HPV test is done.

| Question                                                                                            | Response      | Code |
|-----------------------------------------------------------------------------------------------------|---------------|------|
| Have you ever had a screening test for cervical cancer, using any of these methods described above? | Yes 1         | CX1  |
|                                                                                                     | No 2          |      |
|                                                                                                     | Don't know 77 |      |



## Step 2 Physical Measurements

| CORE: Blood Pressure                                                                                                                              |                                         |      |
|---------------------------------------------------------------------------------------------------------------------------------------------------|-----------------------------------------|------|
| Question                                                                                                                                          | Response                                | Code |
| Interviewer ID                                                                                                                                    | _ _ _                                   | M1   |
| Device ID for blood pressure                                                                                                                      | _ _                                     | M2   |
| Cuff size used                                                                                                                                    | Small 1<br>Medium 2<br>Large 3          | M3   |
| Reading 1                                                                                                                                         | Systolic ( mmHg)  _ _ _                 | M4a  |
|                                                                                                                                                   | Diastolic (mmHg)  _ _ _                 | M4b  |
| Reading 2                                                                                                                                         | Systolic ( mmHg)  _ _ _                 | M5a  |
|                                                                                                                                                   | Diastolic (mmHg)  _ _ _                 | M5b  |
| Reading 3                                                                                                                                         | Systolic ( mmHg)  _ _ _                 | M6a  |
|                                                                                                                                                   | Diastolic (mmHg)  _ _ _                 | M6b  |
| During the past two weeks, have you been treated for raised blood pressure with drugs (medication) prescribed by a doctor or other health worker? | Yes 1<br>No 2                           | M7   |
| CORE: Height and Weight                                                                                                                           |                                         |      |
| <b>For women:</b> Are you pregnant?                                                                                                               | Yes 1 <i>If Yes, go to M 16</i><br>No 2 | M8   |
| Interviewer ID                                                                                                                                    | _ _ _                                   | M9   |
| Device IDs for height and weight                                                                                                                  | Height  _ _                             | M10a |
|                                                                                                                                                   | Weight  _ _                             | M10b |
| Height                                                                                                                                            | in Centimetres (cm)  _ _ _ _ _          | M11  |
| Weight<br><i>If too large for scale 666.6</i>                                                                                                     | in Kilograms (kg)  _ _ _ _ _            | M12  |
| CORE: Waist                                                                                                                                       |                                         |      |
| Device ID for waist                                                                                                                               | _ _                                     | M13  |
| Waist circumference                                                                                                                               | in Centimetres (cm)  _ _ _ _ _          | M14  |
| EXPANDED: Hip Circumference and Heart Rate                                                                                                        |                                         |      |
| Hip circumference                                                                                                                                 | in Centimeters (cm)  _ _ _ _ _          | M15  |
| Heart Rate                                                                                                                                        |                                         |      |
| Reading 1                                                                                                                                         | Beats per minute  _ _ _                 | M16a |
| Reading 2                                                                                                                                         | Beats per minute  _ _ _                 | M16b |
| Reading 3                                                                                                                                         | Beats per minute  _ _ _                 | M16c |
